# Supplementary material for: Musculoskeletal injuries in athletes from five modalities: a cross-sectional study
Source: Springer Nature journal article supplement (doi:10.1186/s12891-020-3141-8), 2020-02-24
Supplement: MOESM1 [file 17738500]

## **QUESTIONNAIRE: Musculoskeletal injuries report for Brazilian athletes.**

Name: \_\_\_\_\_.

Sports training centres or competitions: \_\_\_\_\_.

Phone and e-mail: \_\_\_\_\_.

Date: \_\_\_\_/\_\_\_\_/\_\_\_\_.

### **Part 1 - General information:**

1. Sex: ( ) Female ( ) Male Date of birth: \_\_\_\_/\_\_\_\_/\_\_\_\_.

2. Weight: \_\_\_\_\_ kg. Height: \_\_\_\_\_ cm.

3. Level of schooling: ( ) Middle school. ( ) High school. ( ) University education.

4. Self-classification skin colour (according to the classification scheme of the Brazilian official census – IBGE):

( ) White. ( ) Intermediate. ( ) Black. ( ) Yellow. ( ) Indigenous.

5. Family income (according to the classification scheme of the Brazilian official census - IBGE):

( ) A. ( ) B. ( ) C. ( ) D.

6. Do you have professional nutritional monitoring due to your sport career?

( ) No. ( ) Yes.

7. Do you consume alcohol? ( ) No. Skip to question 8. ( ) Yes.

If yes, what is the frequency of alcohol consumption?

( ) Low (< 7 doses/week). ( ) Moderate (7 to 12 doses/week). ( ) High (high: > 21 doses/week).

8. Do you smoke? ( ) No. Skip to question 9. ( ) Yes.

If yes, what are the type and frequency of smoking?

| Type            | Frequency (number of times per day)         |
|-----------------|---------------------------------------------|
| ( ) Cigarette   | ( ) ≤ 10 ( ) 11 to 20 ( ) 21 to 30 ( ) > 30 |
| ( ) Hand-rolled | ( ) ≤ 10 ( ) 11 to 20 ( ) 21 to 30 ( ) > 30 |
| ( ) Pipe        | ( ) ≤ 10 ( ) 11 to 20 ( ) 21 to 30 ( ) > 30 |
| ( ) Cigar       | ( ) ≤ 10 ( ) 11 to 20 ( ) 21 to 30 ( ) > 30 |
| ( ) Hookah      | ( ) ≤ 10 ( ) 11 to 20 ( ) 21 to 30 ( ) > 30 |

### **Part 2 - Sports and training information:**

9. Sport modality: \_\_\_\_\_.

10. Side of dominance (for sports): ( ) Left. ( ) Right. ( ) Bilateral.

- 11. Coach:** ( ) Physical educator/ Certified athletic trainer. ( ) Former professional athlete.  
 ( ) Both. ( ) Other (please specify): \_\_\_\_\_.
- 12. Age at the beginning of sport practice:** \_\_\_\_\_ years old.
- 13. Years of training:** \_\_\_\_\_ years.
- 14. Weekly training hours:** \_\_\_\_\_ hours per week.

**Part 3 - MSK-I-specific information:**

**15. Joint injury**

- 15.1. Have you ever had any joint injury?** ( ) No. *Skip to question 16.* ( ) Yes.
- 15.2. Did the joint(s) injury(ies) occur during:**  
 ( ) Training. ( ) Competition. ( ) Other (please specify): \_\_\_\_\_.
- 15.3. What was the cause of the joint(s) injury(ies)?** ( ) Overuse. ( ) Trauma.
- 15.4. Was the joint(s) injury(ies) caused by contact:** ( ) No. ( ) Yes.
- 15.5. How many episodes of joint(s) injury(ies) have you experienced?**  
 ( ) ≤ 3. ( ) 4 to 9. ( ) 10 to 15. ( ) > 15.
- 15.6. Date of joint(s) injury(ies):** \_\_\_\_\_.
- 15.7. Joint(s) injury(ies) involved (mark all that apply):**  
 ( ) Shoulder. ( ) Elbow. ( ) Hand. ( ) Hip. ( ) Knee.  
 ( ) Ankle. ( ) Other (please specify): \_\_\_\_\_.
- 15.8. Side of body joint(s) injury(ies):**  
 ( ) Left. ( ) Right. ( ) Bilateral. ( ) Not applicable.
- 15.9. Did you withdraw from sports activities for joint(s) injury(ies)?**  
 ( ) No. *Skip to question 16.*  
 ( ) Yes. Please specify the period \_\_\_\_\_ days. *Skip to question 16.*

➤ **Diagnosis of joint(s) injury(ies):** (this space is to be filled up only by specialized Orthopaedists Members)

- ( ) Physical exam. ( ) Imaging: \_\_\_\_\_  
 \_\_\_\_\_  
 \_\_\_\_\_  
 \_\_\_\_\_

Signature: \_\_\_\_\_ Reviewed by: \_\_\_\_\_

**16. Muscle injury**

**16.1. Have you ever had a muscle injury?** ( ) No. *Skip to question 17.* ( ) Yes.

**16.2. Did the muscle(s) injury(ies) occur during:**

( ) Training. ( ) Competition. ( ) Other (please specify): \_\_\_\_\_.

**16.3. What was the cause of the muscle(s) injury(ies)?** ( ) Overuse. ( ) Trauma.

**16.4. Was the muscle(s) injury(ies) caused by contact:** ( ) No. ( ) Yes.

**16.5. How many episodes of muscle(s) injury(ies) have you experienced?**

( ) ≤ 3. ( ) 4 to 9. ( ) 10 to 15. ( ) > 15.

**16.6. Date of muscle(s) injury(ies):** \_\_\_\_\_.

**16.7. Muscle(s) injury(ies) involved (mark all that apply):**

( ) Thorax. ( ) Shoulder. ( ) Arm. ( ) Forearm. ( ) Anterior thigh.

( ) Posterior thigh. ( ) Lateral leg. ( ) Medial leg. ( ) Calf. ( ) Hip.

( ) Other (please specify): \_\_\_\_\_.

**16.8. Side of body muscle(s) injury(ies):**

( ) Left. ( ) Right. ( ) Bilateral. ( ) Not applicable.

**16.9. Did you withdraw from sports activities for muscle(s) injury(ies)?**

( ) No. *Skip to question 17.*

( ) Yes. Please specify the period \_\_\_\_\_ days. *Skip to question 17.*

➤ **Diagnosis of muscle(s) injury(ies):** (this space is to be filled up only by specialized Orthopaedists Members)

( ) Physical exam. ( ) Imaging: \_\_\_\_\_

\_\_\_\_\_  
\_\_\_\_\_  
\_\_\_\_\_

Signature: \_\_\_\_\_ Reviewed by: \_\_\_\_\_

**17. Tendinopathy**

**17.1. Have you ever had a tendinopathy?** ( ) No. *The end of questionnaire.* ( ) Yes.

**17.2. Did the tendinopathy(ies) occur during:**

( ) Training. ( ) Competition. ( ) Other (please specify): \_\_\_\_\_.

**17.3. What was the cause of the tendinopathy(ies)?** ( ) Overuse. ( ) Trauma.

**17.4. Was the tendinopathy(ies) caused by contact:** ( ) No. ( ) Yes.

**17.5. How many episodes of tendinopathy(ies) have you experienced?**

( ) ≤ 3. ( ) 4 to 9. ( ) 10 to 15. ( ) > 15.

**17.6. Date of tendinopathy(ies):** \_\_\_\_\_.

**17.7. Injury(ies) body part involved (mark all that apply):**

Shoulder.       Elbow.       Hand.       Hip.       Knee.  
 Ankle       Other (please specify): \_\_\_\_\_.

**17.8. Side of tendinopathy(ies):**

Left.       Right.       Bilateral.       Not applicable.

**17.9. Did you withdraw from sports activities for tendinopathy(ies)?**

No. *The end of questionnaire.*

Yes. Please specify the period \_\_\_\_\_ days. *The end of questionnaire.*

➤ **Diagnosis of tendinopathy(ies):** (this space is to be filled up only by specialized Orthopaedists Members)

Physical exam.     Imaging: \_\_\_\_\_

---

---

---

Signature: \_\_\_\_\_ Reviewed by: \_\_\_\_\_

**This is the end of the questionnaire, thank you for participating.**

Signature: \_\_\_\_\_ Reviewed by: \_\_\_\_\_

**Authors:** Rodrigo Araújo Goes<sup>1</sup>, Lucas Rafael Lopes<sup>2,3,4</sup>, Victor Rodrigues Amaral Cossich<sup>2,5</sup>, Vitor Almeida Ribeiro de Miranda<sup>1</sup>, Olívia Nogueira Coelho<sup>5</sup>, Ricardo do Carmo Bastos<sup>1</sup>, Letícia Aparecida Marincolo Domenis<sup>1</sup>, João Antonio Matheus Guimarães<sup>2</sup>, João Alves Grangeiro Neto<sup>1</sup>, Jamila Alessandra Perini<sup>2,3,4</sup>.

<sup>1</sup>Centro de Trauma do Esporte, Instituto Nacional de Traumatologia e Ortopedia (INTO), Rio de Janeiro, Brazil;

<sup>2</sup>Divisão de Pesquisa, Instituto Nacional de Traumatologia e Ortopedia (INTO), Rio de Janeiro, Brazil;

<sup>3</sup>Laboratório de Pesquisa de Ciências Farmacêuticas, Centro Universitário Estadual da Zona Oeste (UEZO), Rio de Janeiro, Brazil;

<sup>4</sup>Programa de Pós-graduação em Saúde Pública e Meio Ambiente, Escola Nacional de Saúde Pública, Fundação Oswaldo Cruz (Fiocruz), Rio de Janeiro, Brazil;

<sup>5</sup>Escola de Educação Física e Desportos (EEFD), Universidade Federal do Rio de Janeiro (UFRJ), Rio de Janeiro, RJ, Brazil.
